# Supplementary material
Source: PubMed Central journal article supplement (PMC5087964)
Supplement: jbt.27-125-s01.pdf [file jbt.27-125-s01.pdf]

# Proportion of Perfect Reads

**a**

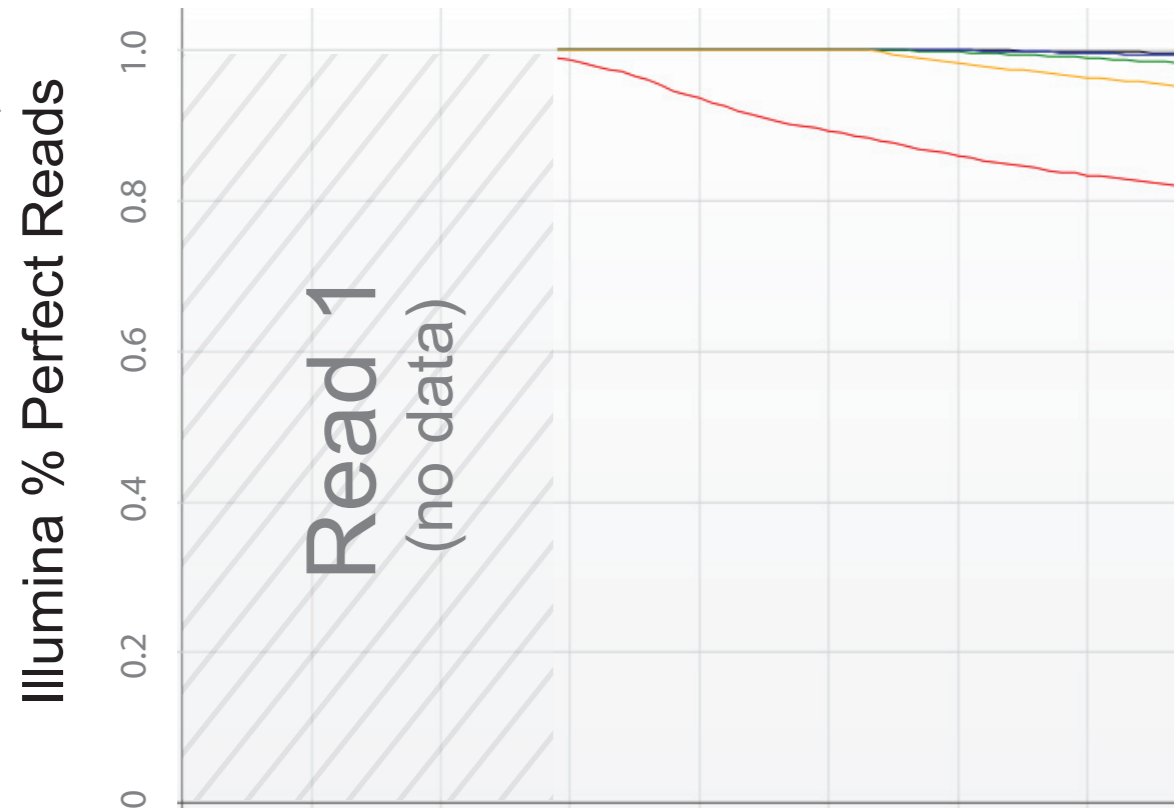

**b**

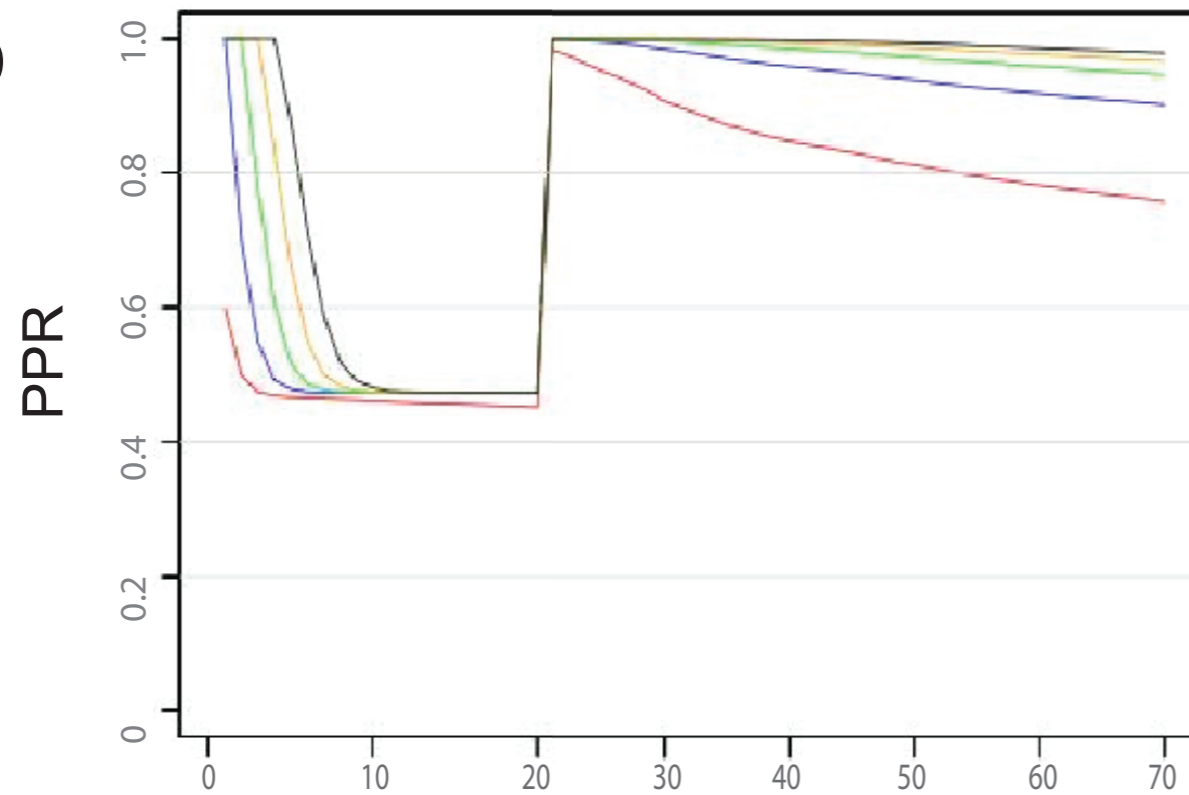

PPR can handle poor quality reads that Illumina % Perfect Reads cannot

**c**

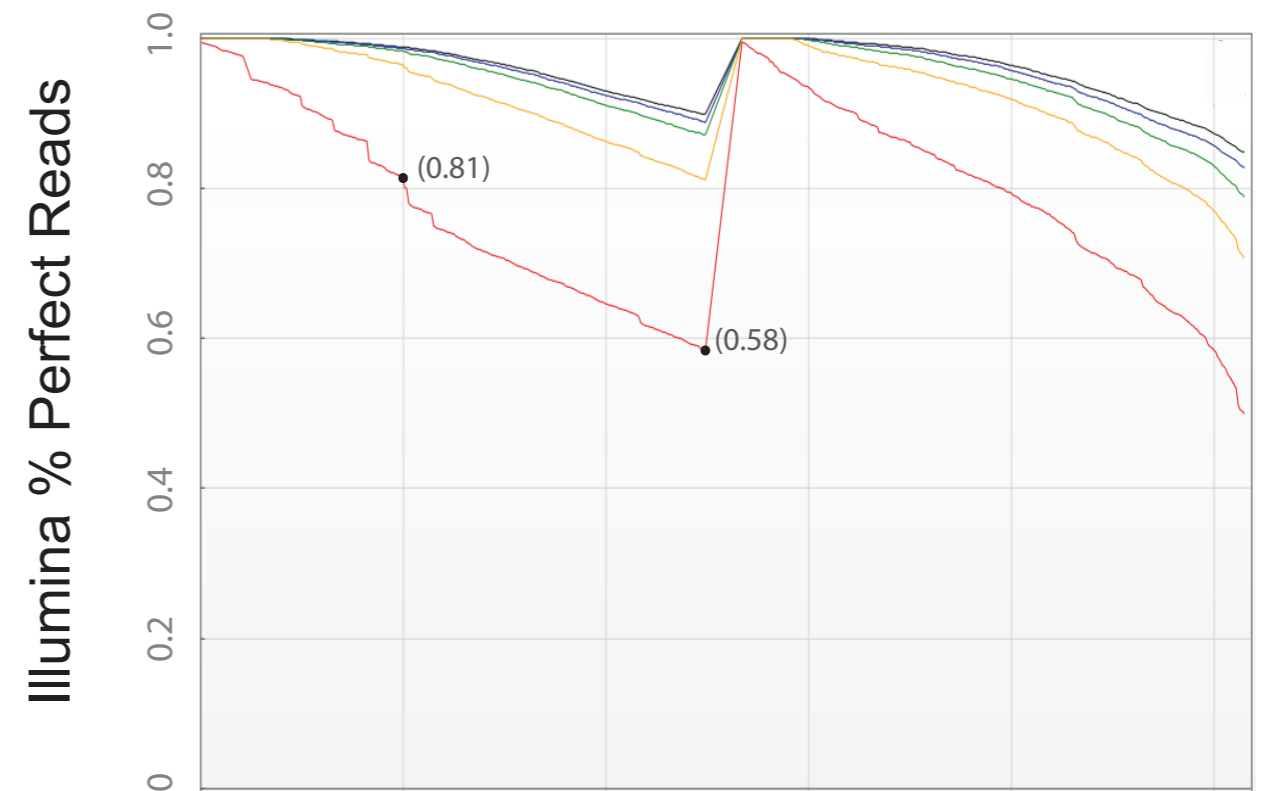

**d**

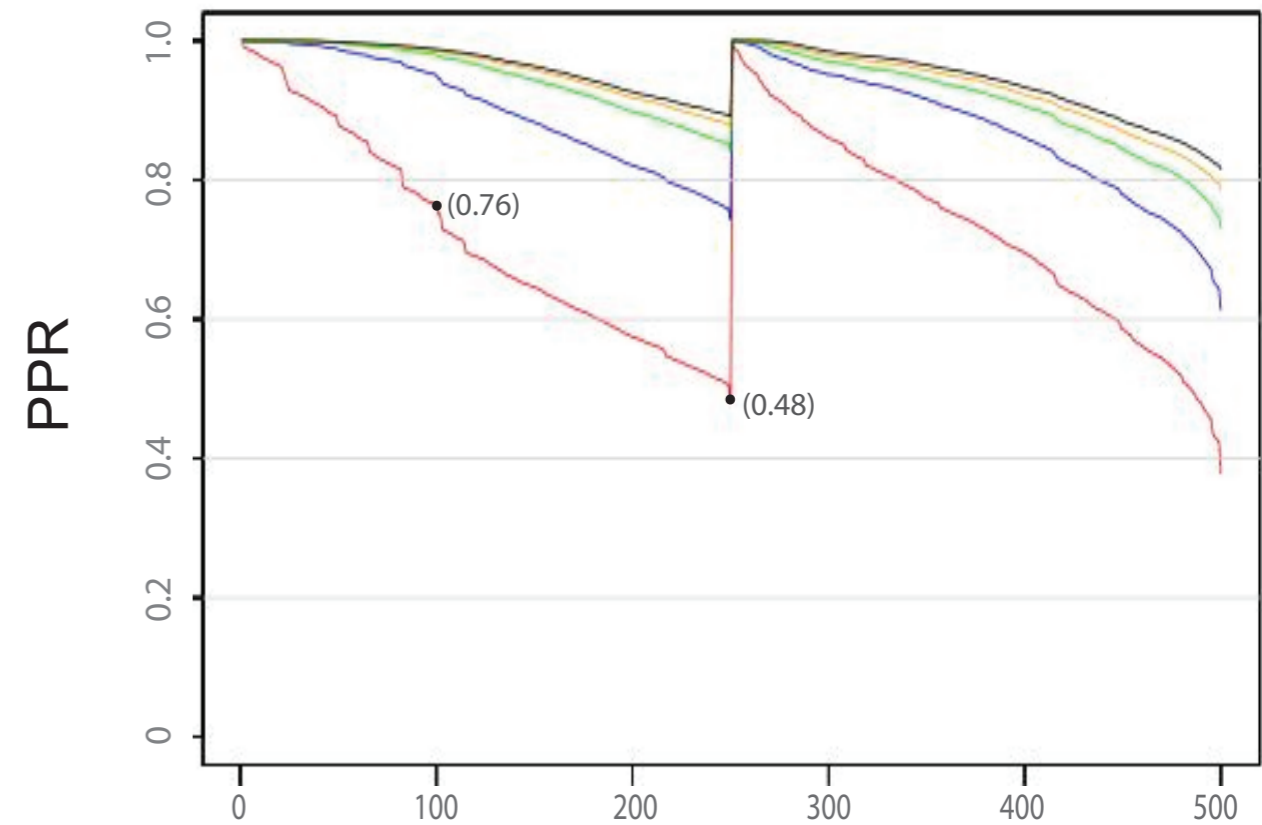

PPR yields higher error rates than Illumina % Perfect Reads

Read Cycle
